# Supplementary material for: Mitochondria targeted and NADH triggered photodynamic activity of chloromethyl modified Ru(ii) complexes under hypoxic conditions
Source: Royal Society of Chemistry journal article supplement (doi:10.1039/c8cc09186b), 2019-01-01
Supplement: c8cc09186b1.pdf [file c8cc09186b1.pdf]

**Electronic Supplementary Information**  
**for**  
**Mitochondria targeted and NADH triggered photodynamic**  
**activity of chloromethyl modified Ru(II) complexes under**  
**hypoxic condition**

Na Tian,<sup>ab</sup>Weize Sun,<sup>ab</sup>Xusheng Guo,<sup>ab</sup>Jian Lu,<sup>ab</sup>Chao Li,<sup>a</sup>Yuanjun Hou<sup>a</sup>,Xuesong Wang<sup>\*ab</sup> and  
Qianxiong Zhou<sup>\*a</sup>

<sup>a</sup> Key Laboratory of Photochemical Conversion and Optoelectronic Materials, Technical Institute of Physics and Chemistry,  
Chinese Academy of Sciences, Beijing 100190, P. R. China. Fax: +86-10-62564049; Tel: +86-10-82543592;

<sup>b</sup>University of Chinese Academy of Sciences, Beijing 100049, P. R. China.

E-mail: xswang@mail.ipc.ac.cn (X.Wang); zhouqianxiong@mail.ipc.ac.cn (Q. Zhou).

## Experimental section

### Materials

RuCl<sub>3</sub>·3H<sub>2</sub>O, 2,2'-bipyridine (bpy), 4,4'-bis(chloromethyl)-2,2'-bipyridine(bcm-bpy), 4,4'-dimethyl-2,2'-dipyridine (dmbpy), 1,10-phenanthroline monohydrate (phen), gel loading buffer, tris-hydroxymethyl-aminomethane (Tris base) were purchased from Sigma Aldrich. The supercoiled pBR322 plasmid DNA was obtained from TaKaRa Biotechnology Company. Dulbecco's modification of Eagle's medium (DMEM), penicillin, streptomycin, fetal bovine serum, and 10 mM PBS (pH = 7.4) were purchased from Corning.

### Instruments

<sup>1</sup>H NMR spectra were determined on a Bruker DMX-400 MHz spectrophotometer. High-resolution ESI mass spectrometry (HR ESI-MS) spectra were recorded on a Bruker APEX IV (7.0T) FT\_MS. UV-vis absorption spectra were obtained on a Shimadzu UV-1601 spectrophotometer.

EPR spectra were measured on a Bruker ESP-300E spectrometer at 9.8 GHz, X-band, with 100 Hz field modulation. Samples were injected quantitatively into quartz capillaries, purged with argon for 20 min in the dark, and illuminated in the cavity of the EPR spectrometer with a mercury lamp (> 400nm).

For other assays needed for irradiation, an LED lamp (470 ± 10nm) was used as light source.

Laser confocal scanning microscope images were collected on a Olympus FV1000.

Purity of 1-3 was verified by high performance liquid chromatography (HPLC). HPLC analysis was done on an HITACHI series instrument using a WH-C-18 column (5 μm, 4 mm × 150 mm). Flow: 1 mL/min with 100% CH<sub>3</sub>CN; Pump: Chromaster 5110; autosampler: Chromaster 5210; UV detector: Chromaster 5420.

### log Po/wmeasurements

The *n*-octanol/water partition coefficients were determined at room temperature following a reported method.<sup>[1]</sup> 1-3 (30 μM) were added in a mixed solution containing 1 mL water and 1mL *n*-octanol, then sonicated for 30 min and centrifuged at 4000 rpm for 10 min. The concentrations of complexes in two phases were measured by UV-vis. Each measurement was repeated for 3 times.

### Cell Culture in hypoxia.

SKOV-3 cells were cultured with DMEM and 10% FBS at 37 °C in an anaerobic incubator, with 5% CO<sub>2</sub> and 3% O<sub>2</sub> (N<sub>2</sub> was another gas source to control O<sub>2</sub> partial pressure).

### Cellular uptake

SKOV-3 cells were cultured in 25 cm<sup>2</sup> bottle for 24h, then incubated with 1-3 (1 μM) for 4 h. Cells were washed with PBS, and obtained by trypsinization, then washed for another two times. The cell organelles were obtained as the procedure given by the Mitochondria Isolation Kit from Invent. After chemical digestion for 24 h, they were diluted with 2% HNO<sub>3</sub> to take ICP-MS measurements.

### Laser confocal scanning microscopy

SKOV-3 cells in 20mm<sup>2</sup> glass bottom dishes were treated with 1-3 (5 μM) for 4 h, then washed with PBS and then incubated with Mito-tracker Green (50 nM) for 10 min. After rinsed 3 times with PBS, the cells were imaged on a CLSM (Olympus FV1000). Mito-tracker Green was excited at 470 nm and monitored at 510-530 nm, while 1-3 were excited at 488 nm and monitored at 610-

650 nm.

#### **MTT assay**

Cells were seeded in 96 well plates at the density of 5000-8000 cells per well for 24 h, then incubated with different concentrations of **1-3** for 4 h. Light groups were irradiated for 30 min (470 nm, 22.5 mW/cm<sup>2</sup>), and cells were cultivated for another 20 h. Cell medium was discarded and MTT (1 mg/mL) was added. 4 h later, MTT solution was removed and DMSO was added. And obtained the results by a Thermo MK3Multiscanmicroplate reader at 570 nm.

#### **Apoptosis and JC-1 staining assay**

Annexin V-FITC staining of the membranes was performed by using the annexin V-FITC and PI apoptosis detection kit. SKOV-3 cells were incubated with **3** for 4 h, then irradiated with 470nm LED lamp (22.5 mW/cm<sup>2</sup>) for 30 min. Cells were harvested after another 6h, stained with annexin V-FITC/PI and analyzed by flow cytometry. Similar procedure was used for JC-1 staining assay.

#### **SKOV-3 cellular NADH measurement**

10<sup>5</sup> SKOV-3 cells were seeded in 6 well plates and incubated with **1-3** for 4 h. Light groups were irradiated for 30 min (470 nm, 22.5 mW/cm<sup>2</sup>). Then cells were washed with cold PBS and homogenized with 100  $\mu$ L NADH extraction buffer. The extracts were heated for 5 min at 60°C, then 20  $\mu$ L Assay Buffer and 100  $\mu$ L NAD extraction buffer were added. After centrifugation with 14000 rpm for 5 min, the supernatant was used for NADH detection.

#### **Synthesis and characterization of 1-3**

Ru(phen)<sub>2</sub>Cl<sub>2</sub> and Ru(bcm-bpy)<sub>2</sub>Cl<sub>2</sub> were synthesized by the reported methods.<sup>[2]</sup>

#### **Synthesis and characterization of 1**

100 mg Ru(phen)<sub>2</sub>Cl<sub>2</sub> (0.19 mmol) and bcm-bpy (50.6 mg, 0.2 mmol) were refluxed in CH<sub>3</sub>OH overnight under a N<sub>2</sub> atmosphere. Solvent was removed by rotary evaporator. Complex **1** was purified on silica gel using CH<sub>3</sub>CN/H<sub>2</sub>O/KNO<sub>3</sub>(10:4:1) as eluent and precipitated by excess NH<sub>4</sub>PF<sub>6</sub>. Yield: 80%. <sup>1</sup>H NMR (400 MHz, CD<sub>3</sub>CN)  $\delta$  8.70 (d, *J* = 8.2 Hz, 2H), 8.65 – 8.55 (m, 4H), 8.33 – 8.19 (m, 6H), 7.89 (t, *J* = 8.8 Hz, 2H), 7.83 (dd, *J* = 8.2, 5.3 Hz, 2H), 7.70 (d, *J* = 5.8 Hz, 2H), 7.59 (dd, *J* = 8.2, 5.3 Hz, 2H), 7.35 (d, *J* = 5.1 Hz, 2H), 4.82 (s, 4H). HR ESI-MS: *m/z* = 357.0315 for (M-2PF<sub>6</sub>)<sup>2+</sup>. HPLC purity > 95%.

#### **Synthesis and characterization of 2**

100 mg Ru(bcm-bpy)<sub>2</sub>Cl<sub>2</sub> (0.15 mmol) and 1,10-phenanthroline (28.8 mg, 0.16 mmol) were refluxed in CH<sub>3</sub>OH overnight under N<sub>2</sub> atmosphere. Solvent was removed by rotary evaporator. Complex **2** was purified on silica gel using CH<sub>3</sub>CN/H<sub>2</sub>O/KNO<sub>3</sub>(10:4:1) as eluent and precipitated by excess NH<sub>4</sub>PF<sub>6</sub>. Yield: 65%. <sup>1</sup>H NMR (400 MHz, CD<sub>3</sub>CN)  $\delta$  8.69–8.61 (m, 4H), 8.59 (s, 2H), 8.28 (s, 2H), 8.10 (s, 2H), 7.87 (d, *J* = 6.0 Hz, 2H), 7.78 (s, 2H), 7.53 (d, *J* = 5.2 Hz, 4H), 7.29 (s, 2H), 4.87 (s, 4H), 4.78 (s, 4H). HR ESI-MS: *m/z* = 394.0017 for (M-2PF<sub>6</sub>)<sup>2+</sup>. HPLC purity > 95%.

#### **Synthesis and characterization of 3**

RuCl<sub>3</sub>·xH<sub>2</sub>O (50 mg, 0.19 mmol) and bcm-bpy (152 mg, 0.6 mmol) were refluxed in DMF overnight under a N<sub>2</sub> atmosphere. Solvent was removed by rotary evaporator. Complex **3** was purified on silica gel using CH<sub>3</sub>CN/H<sub>2</sub>O/ KNO<sub>3</sub> (10:4:1) as eluent and precipitated by excess NH<sub>4</sub>PF<sub>6</sub>. Yield: 55%. <sup>1</sup>H NMR (400 MHz, CD<sub>3</sub>CN)  $\delta$  8.49 (s, 6H), 7.61 (d, *J* = 5.8 Hz, 6H), 7.37 (d, *J* = 5.9 Hz, 6H), 4.73 (s, 12H). HR ESI-MS: *m/z* = 429.9834 for (M-2PF<sub>6</sub>)<sup>2+</sup>. HPLC purity > 95%.

**Table S1.** Log  $P_{O/W}$  and SKOV-3 cellular uptake levels of **1-3**.

|                                | <b>1</b>         | <b>2</b>         | <b>3</b>         |
|--------------------------------|------------------|------------------|------------------|
| Log $P_{O/W}$                  | $-1.41 \pm 0.02$ | $-1.26 \pm 0.05$ | $-0.97 \pm 0.03$ |
| pmol/ $10^6$ cell <sup>a</sup> | $32.1 \pm 1.4$   | $35.1 \pm 2.1$   | $65.4 \pm 3.0$   |

<sup>a</sup> measured by inductively coupled plasma-mass spectrometry (ICP-MS).

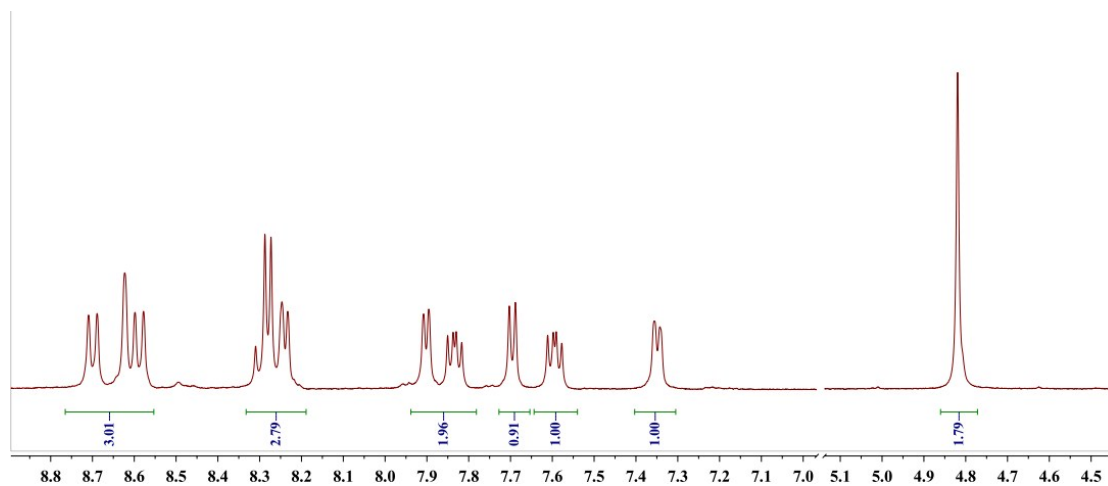

**Fig. S1** <sup>1</sup>H NMR spectrum of **1** in CD<sub>3</sub>CN.

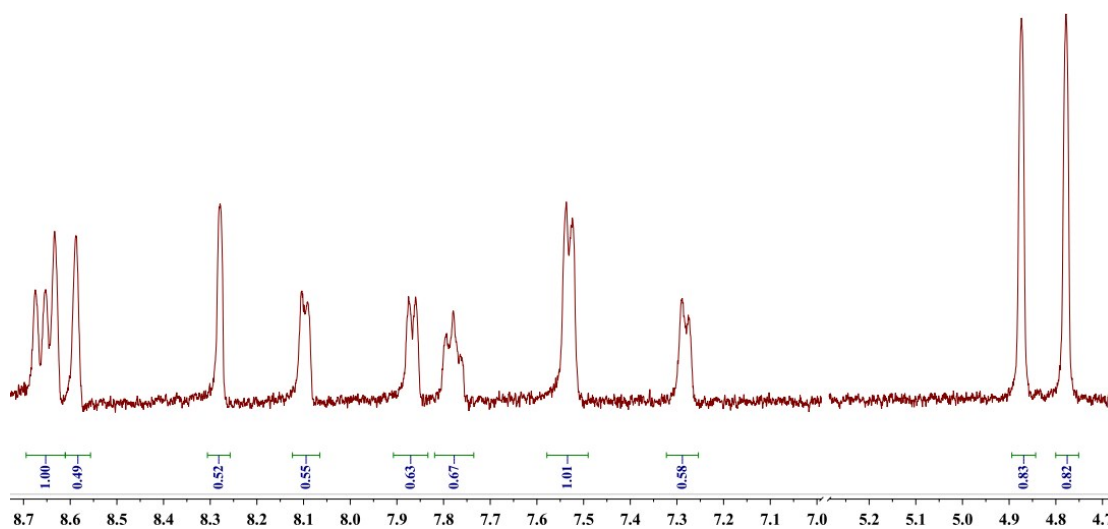

**Fig. S2** <sup>1</sup>H NMR spectrum of **2** in CD<sub>3</sub>CN.

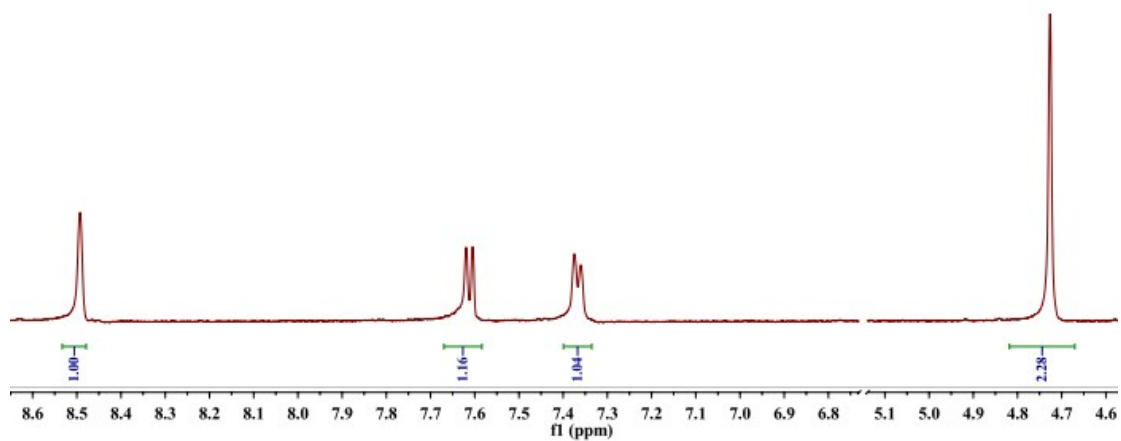

Fig. S3  $^1\text{H}$  NMR spectrum of **3** in  $\text{CD}_3\text{CN}$ .

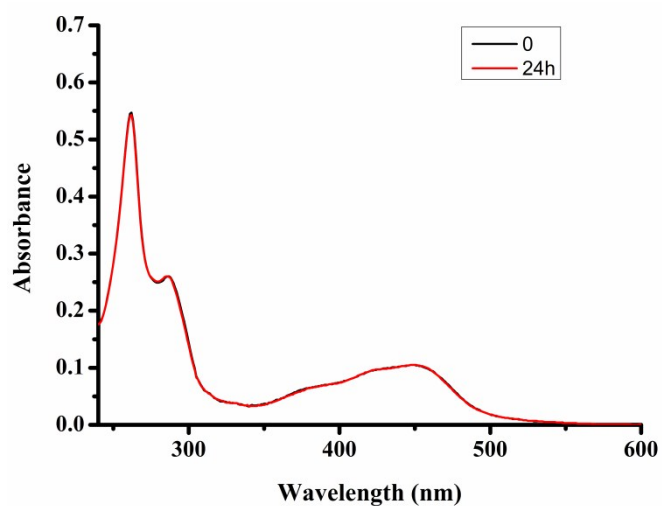

Fig. S4 Absorption spectra changes of **1** ( $10\ \mu\text{M}$ ) in  $\text{H}_2\text{O}$  for 24 h in the dark.

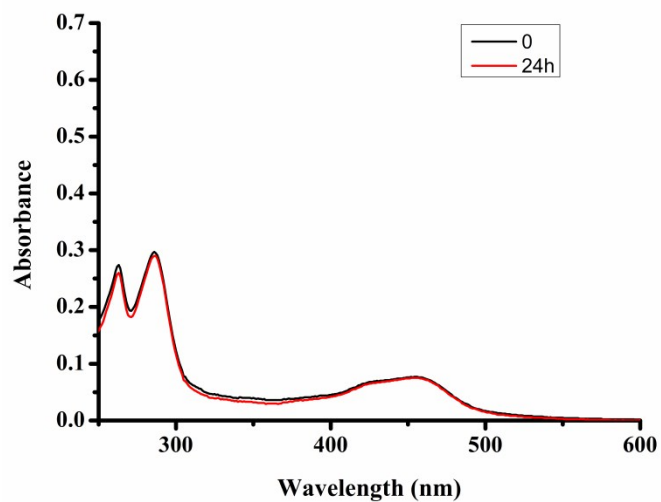

Fig. S5 Absorption spectra changes of **2** ( $10\ \mu\text{M}$ ) in  $\text{H}_2\text{O}$  for 24 h in the dark.

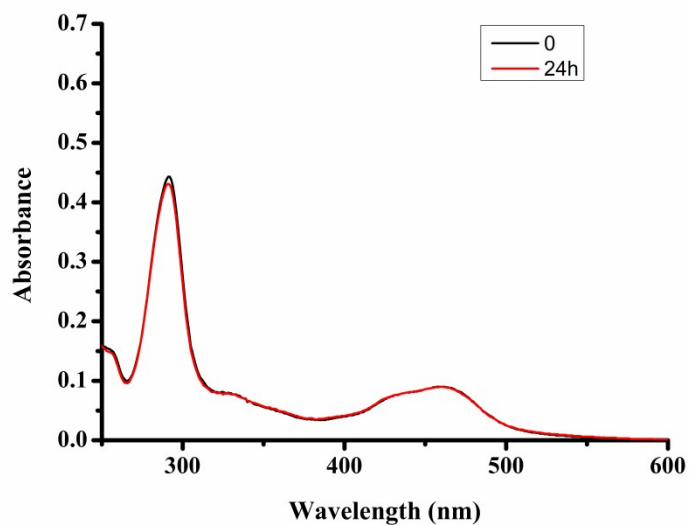

**Fig. S6** Absorption spectra changes of **3** (10  $\mu$ M) in H<sub>2</sub>O for 24 h in the dark.

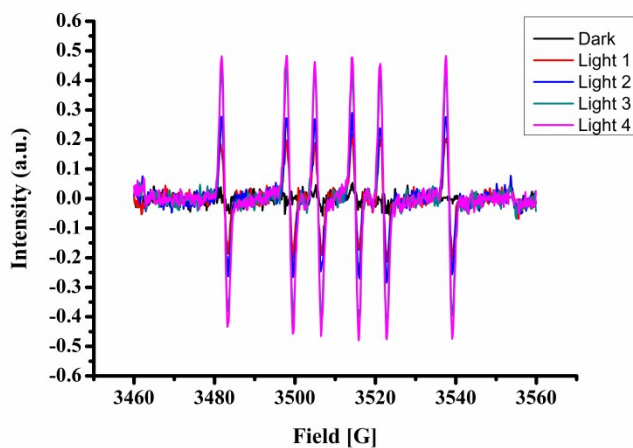

**Fig. S7** EPR signals obtained upon irradiation (>400 nm) of **1** (1 mM) in Ar-saturated H<sub>2</sub>O solution in the presence of NADH (120 mM) and DMPO (50 mM).

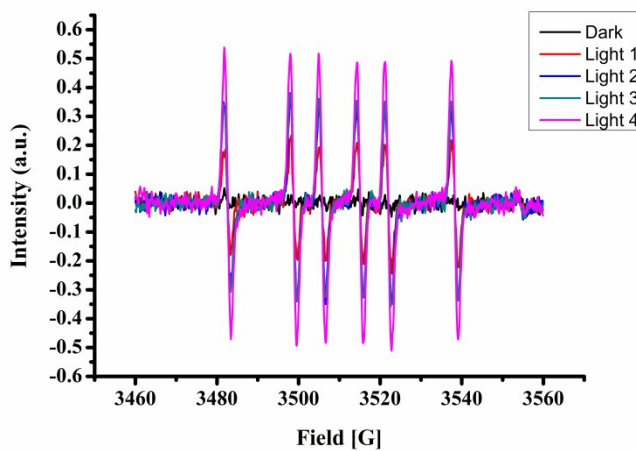

**Fig. S8** EPR signals obtained upon irradiation (>400 nm) of **2** (1 mM) in Ar-saturated H<sub>2</sub>O solution in the presence of NADH (120 mM) and DMPO (50 mM).

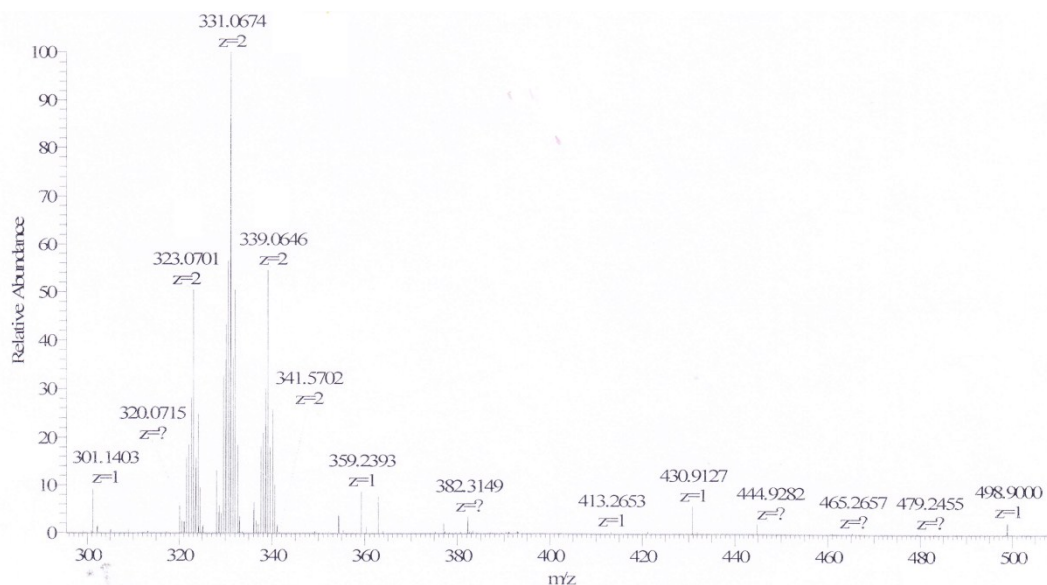

**Fig. S9** HR ESI-MS of complex **1** (1 mM) in Ar-saturated H<sub>2</sub>O in the presence of NADH (120 mM) after 470 nm LED irradiation for 5 min. The m/z peak of 323.0701 can be ascribed to the product in which two chloromethyl groups were transformed into methyl groups (cal. m/z = 323.0709). Similarly, the m/z peak of 331.0674 can be ascribed to the product with one methyl group and one hydroxymethyl group (cal. m/z = 331.0684).

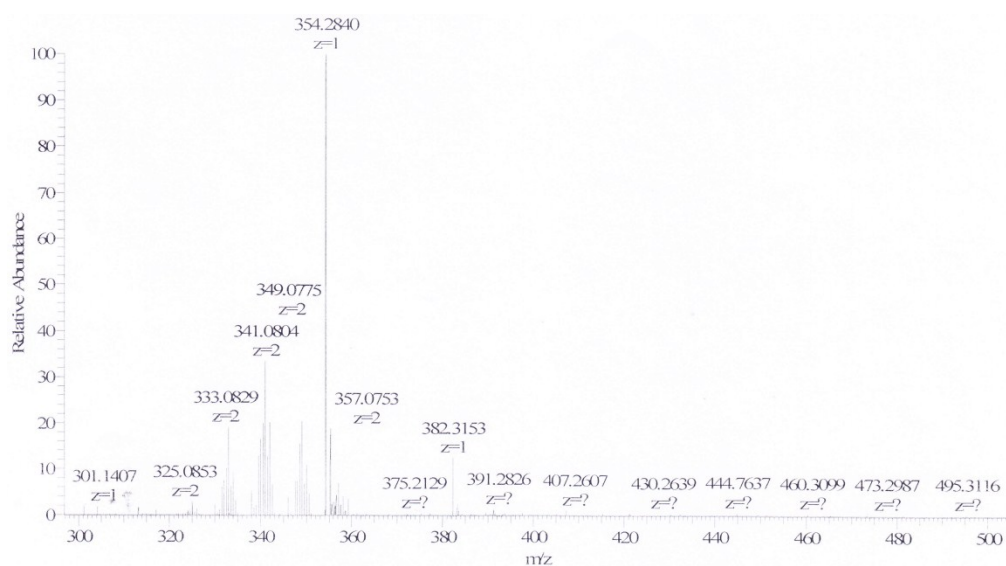

**Fig. S10** HR ESI-MS of complex **2** (1 mM) in Ar-saturated H<sub>2</sub>O in the presence of NADH (120 mM) after 470 nm LED irradiation for 5 min. The m/z peak of 325.0853 can be ascribed to the product with four methyl groups (cal. m/z = 325.0866); m/z peak of 333.0829 for the product with three methyl groups and one hydroxymethyl group (cal. m/z = 333.0840); m/z peak of 341.0804 for the product with two methyl groups and two hydroxymethyl groups (cal. m/z = 341.0815); m/z peak of 349.0775 for the product with one methyl group and three hydroxymethyl groups (cal. m/z = 349.0789).

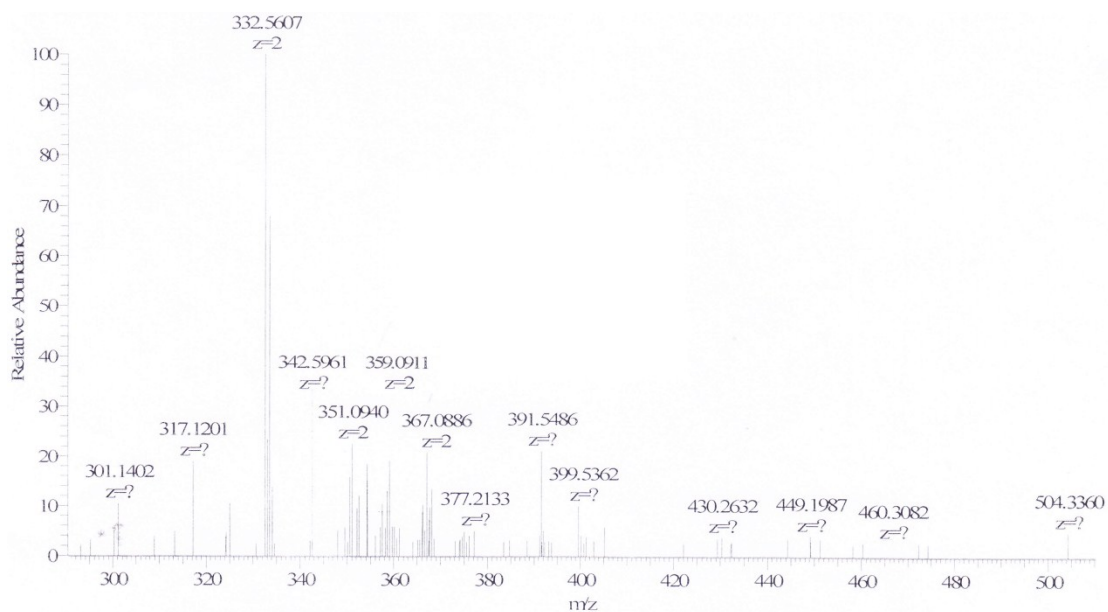

**Fig. S11** HR ESI-MS of complex **3** (1 mM) in Ar-saturated H<sub>2</sub>O in the presence of NADH (120 mM) after 470 nm LED irradiation for 5 min. The m/z peak of 351.0940 can be ascribed to the product with three methyl groups and three hydroxymethyl groups (cal. m/z = 351.0946); m/z peak of 359.0911 for the product with two methyl groups and four hydroxymethyl groups (cal. m/z = 359.0921); m/z peak of 367.0886 for the product with one methyl group and five hydroxymethyl groups (cal. m/z = 367.0896).

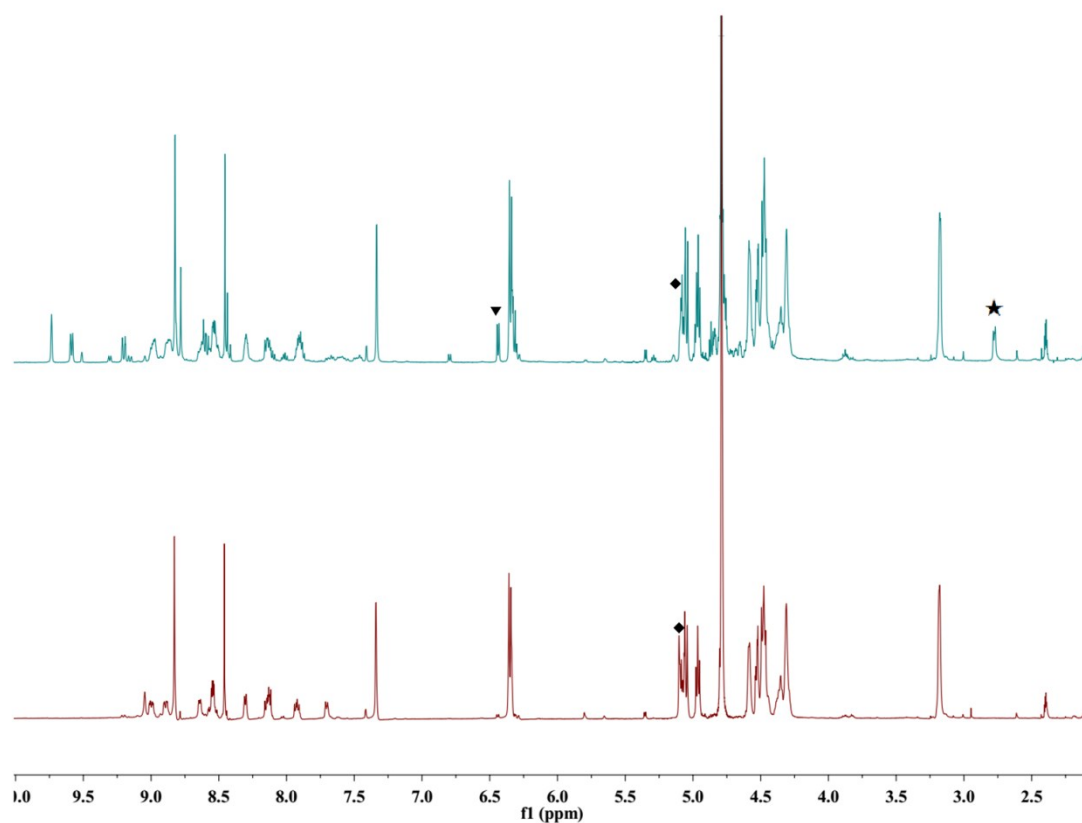

**Fig. S12** <sup>1</sup>H NMR spectra of complex **1** in Ar-saturated CD<sub>3</sub>COCD<sub>3</sub>/D<sub>2</sub>O (1:1, v/v) solution in the



presence of NADH before (bottom) and after (top) 470 nm LED irradiation. The resulted methyl groups were indicated by ★, which were verified by comparison with that of [Ru(phen)<sub>2</sub>(bmbpy)]<sup>2+</sup> (not shown). The signal of the methylene groups were indicated by ◆, and the new signal at about 6.5 ppm (indicated by ▼) after light irradiation can be ascribed to NAD<sup>+</sup> by comparison with the NMR spectrum of NAD<sup>+</sup> in the same solvent (see Fig. S31).

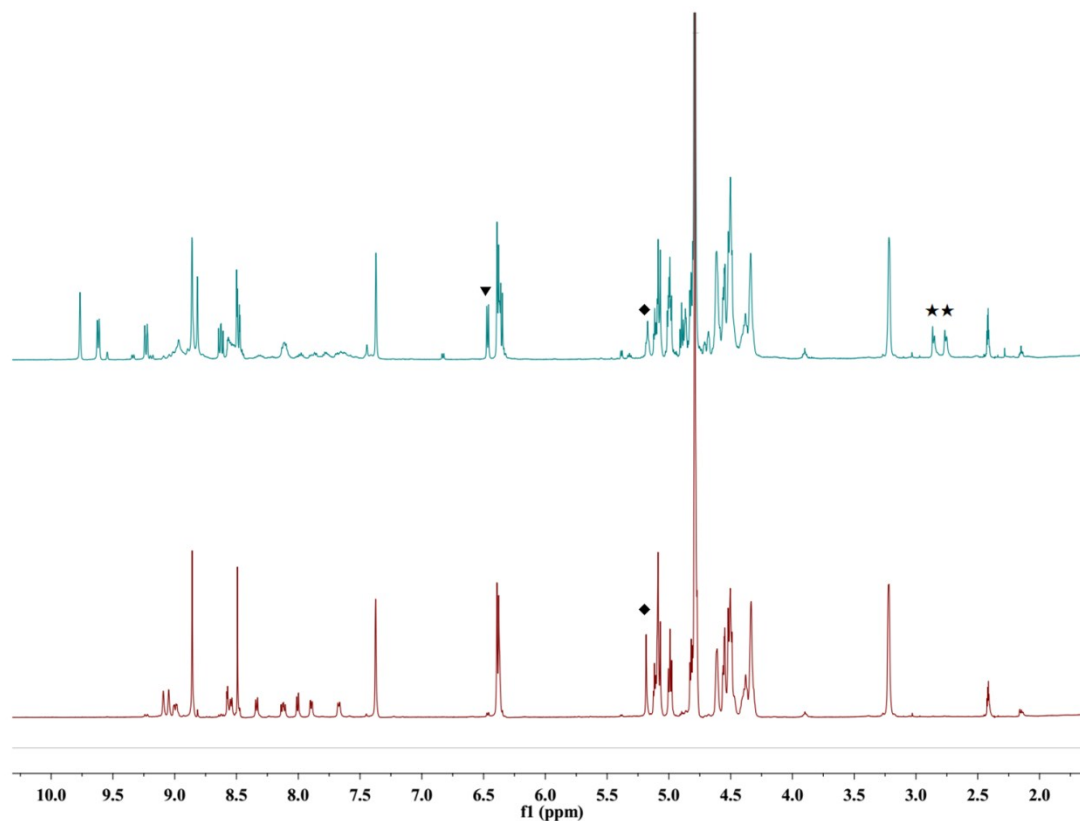

**Fig. S13** <sup>1</sup>H NMR spectra of complex **2** in Ar-saturated CD<sub>3</sub>COCD<sub>3</sub>/D<sub>2</sub>O (1:1, v/v) solution in the presence of NADH before (bottom) and after (top) 470 nm LED irradiation. The resulted methyl groups were indicated by ★. The signal of the methylene groups were indicated by ◆, and the new signal at about 6.5 ppm (indicated by ▼) after light irradiation can be ascribed to NAD<sup>+</sup> by comparison with the NMR spectrum of NAD<sup>+</sup> in the same solvent (see Fig. S31).

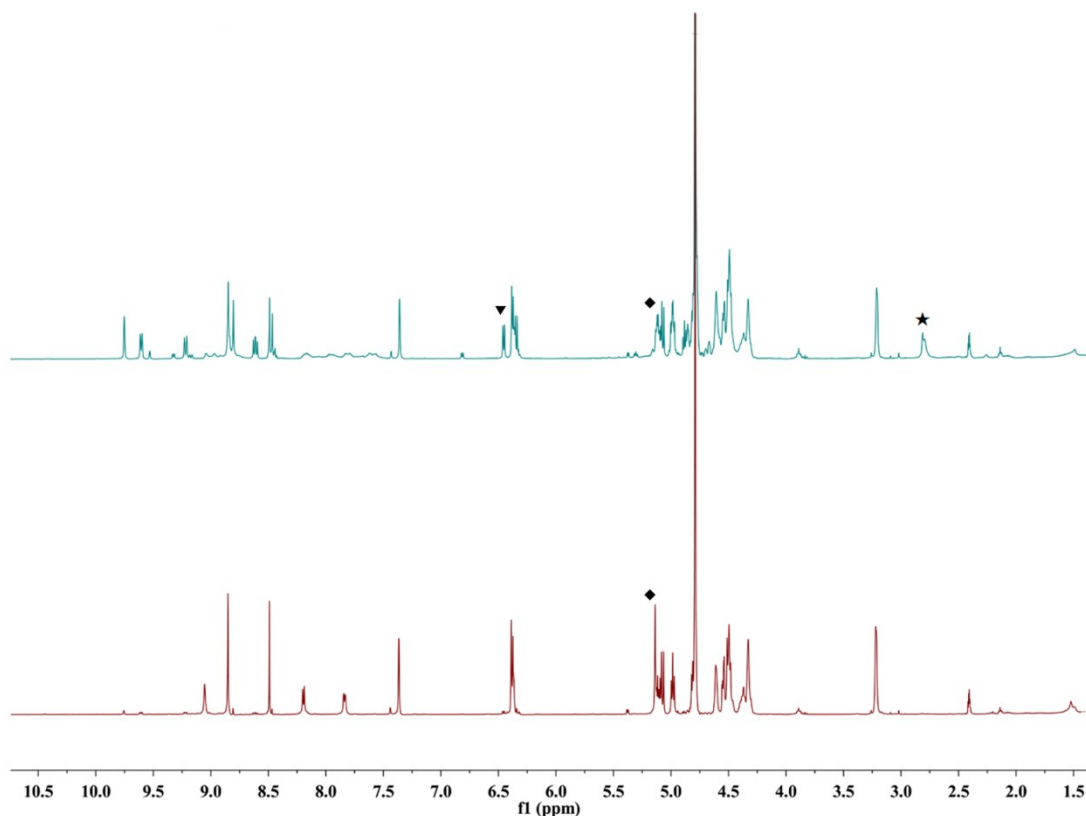

**Fig. S14**  $^1\text{H}$  NMR spectra of complex **3** in Ar-saturated  $\text{CD}_3\text{COCD}_3/\text{D}_2\text{O}$  (1:1, v/v) solution in the presence of NADH before (bottom) and after (top) 470 nm LED irradiation. The resulted methyl groups were indicated by ★. The signal of the methylene groups were indicated by ◆, and the new signal at about 6.5 ppm (indicated by ▼) after light irradiation can be ascribed to  $\text{NAD}^+$  by comparison with the NMR spectrum of  $\text{NAD}^+$  in the same solvent (see Fig. S31).

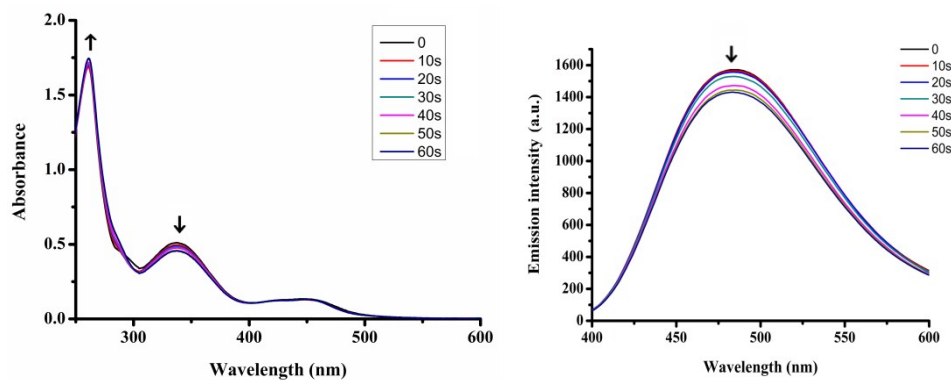

**Fig. S15** Absorption and emission ( $\lambda_{\text{ex}} = 360$  nm) spectra changes of mixed **1** (10  $\mu\text{M}$ ) and NADH (70  $\mu\text{M}$ ) in Ar-saturated  $\text{H}_2\text{O}$  solution upon 470 nm LED irradiation.

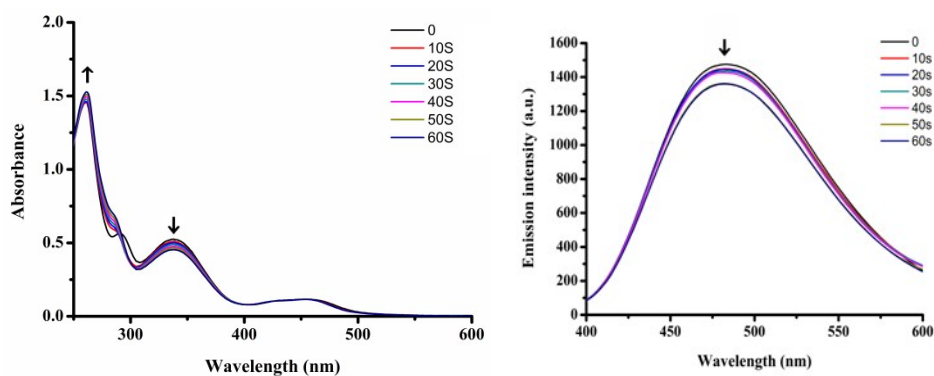

**Fig. S16** Absorption and emission ( $\lambda_{\text{ex}} = 360 \text{ nm}$ ) spectra changes of mixed **2** ( $10 \mu\text{M}$ ) and NADH ( $70 \mu\text{M}$ ) in Ar-saturated  $\text{H}_2\text{O}$  solution upon 470 nm LED irradiation.

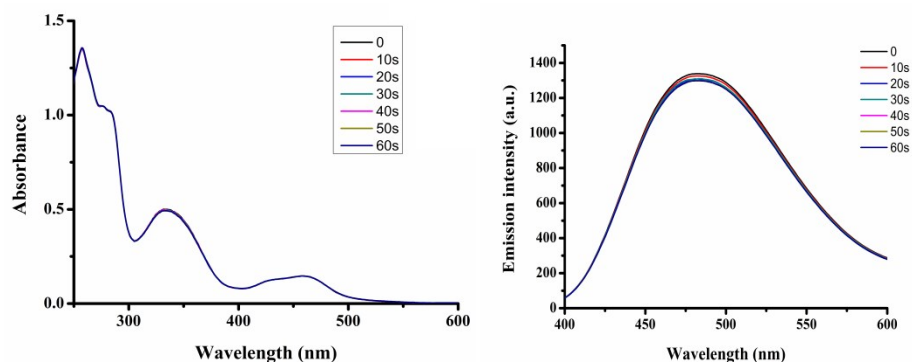

**Fig. S17** Absorption and emission ( $\lambda_{\text{ex}} = 360 \text{ nm}$ ) spectra changes of mixed  $[\text{Ru}(\text{bmbpy})_3]^{2+}$  (bmbpy = 4,4'-bismethyl-2,2'-bipyridine) ( $10 \mu\text{M}$ ) and NADH ( $70 \mu\text{M}$ ) in Ar-saturated  $\text{H}_2\text{O}$  solution upon 470 nm LED irradiation.

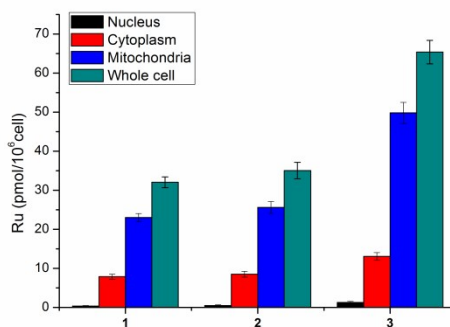

**Fig. S18** ICP-MS quantifications of **1-3** in different subcellular organelles.

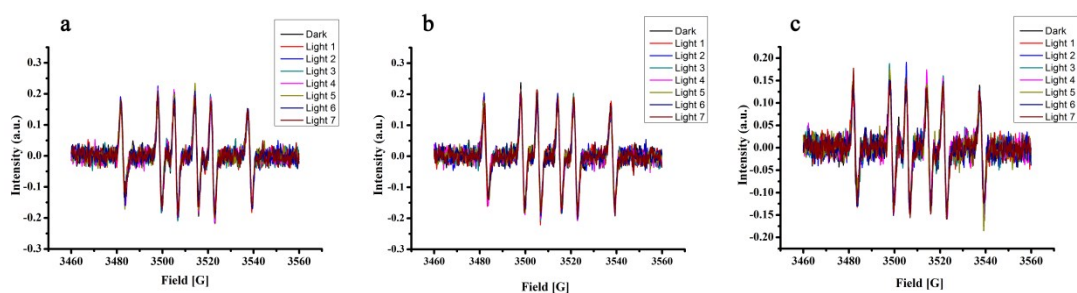

**Fig. S19** EPR signals obtained upon irradiation ( $> 400 \text{ nm}$ ) of **1-3** (a-c,  $1 \text{ mM}$ ) in Ar-saturated

DNA buffer solutions in the presence of DMPO (50 mM).

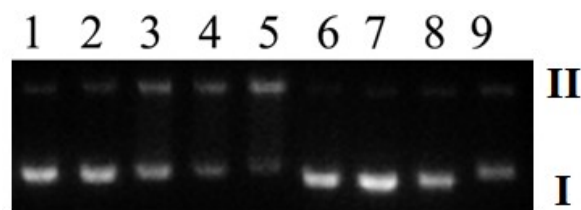

**Fig. S20** Agarose gel electrophoresis pattern of pBR322 DNA (100 mM in base pairs) in Ar-saturated Tris-EDTA (pH = 7.5) upon irradiation (470 nm) for 5 min in the presence of complexes **1-2** with varied concentrations. Lane 1: DNA control; Lane 2: DNA+ **2** (80  $\mu$ M) in the dark; Lane 3-5: Light + **2** with concentration of 20, 50 and 80  $\mu$ M, respectively; Lane 6: DNA+ **1** (80  $\mu$ M) in the dark; Lane 7-9: Light + **1** with concentration of 20, 50 and 80  $\mu$ M, respectively.

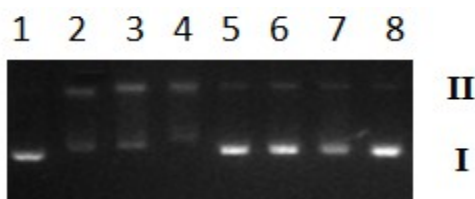

**Fig. S21** Agarose gel electrophoresis pattern of pBR322 DNA (100 mM in base pairs) in Ar-saturated Tris-EDTA (pH = 7.5) upon irradiation (470 nm) for 1.5 min in the presence of 80  $\mu$ M Ru complexes. Lane 1: DNA; Lane 2-4: **1-3** + Light; Lane 5-7: **1-3** + Dark; Lane 8: [Ru(bmbpy)<sub>3</sub>]<sup>2+</sup> + Light.

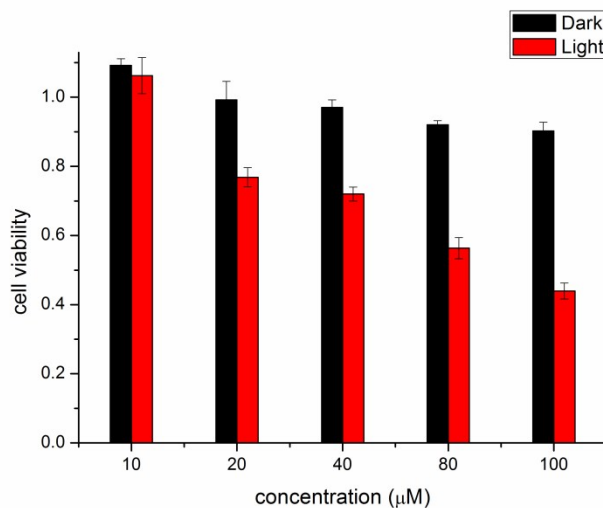

**Fig. S22** Cytotoxicity of **1** towards SKOV-3 cells under hypoxic condition (3% O<sub>2</sub>) in the dark or irradiated with 470 nm LED for 30 min (22.5 mW/cm<sup>2</sup>).

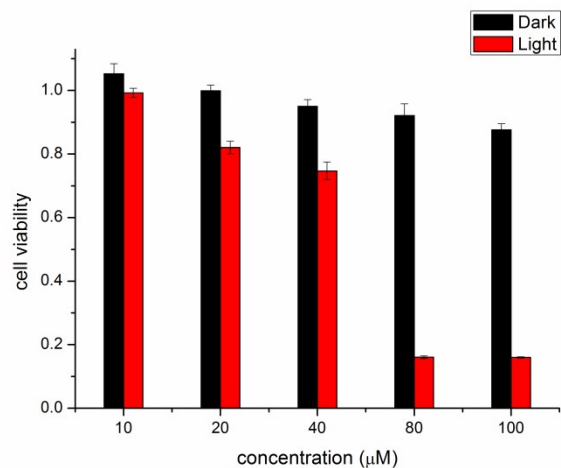

**Fig. S23** Cytotoxicity of **2** towards SKOV-3 cells under hypoxic condition (3% O<sub>2</sub>) in the dark or irradiated with 470 nm LED for 30 min (22.5 mW/cm<sup>2</sup>).

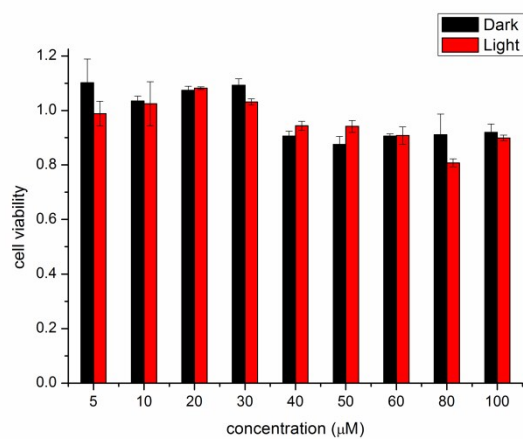

**Fig. S24** Cytotoxicity of [Ru(bmbpy)<sub>3</sub>]<sup>2+</sup> towards SKOV-3 cells under hypoxic condition (3% O<sub>2</sub>) in the dark or irradiated with 470 nm LED for 30 min (22.5 mW/cm<sup>2</sup>).

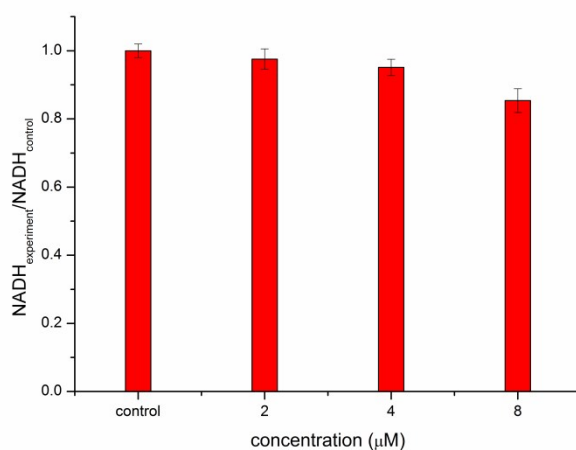

**Fig. S25** SKOV-3 cellular NADH changes in the presence of **1** with different concentrations in the dark and under hypoxic condition (3% O<sub>2</sub>).

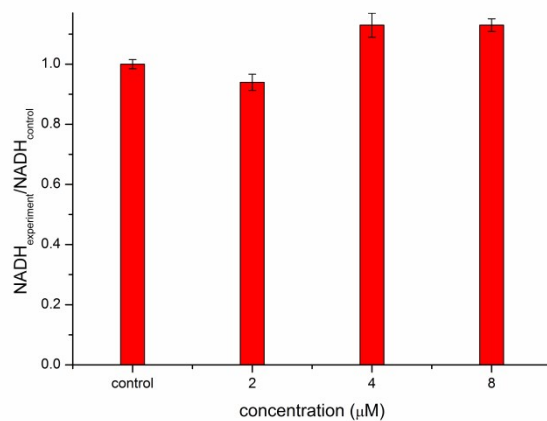

**Fig. S26** SKOV-3 cellular NADH changes in the presence of **2** with different concentrations in the dark and under hypoxic condition (3%  $\text{O}_2$ ).

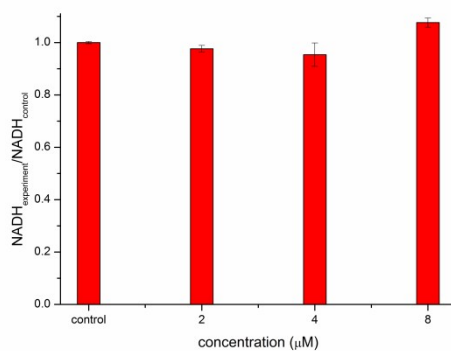

**Fig. S27** SKOV-3 cellular NADH changes in the presence of **3** with different concentrations in the dark and under hypoxic condition (3%  $\text{O}_2$ ).

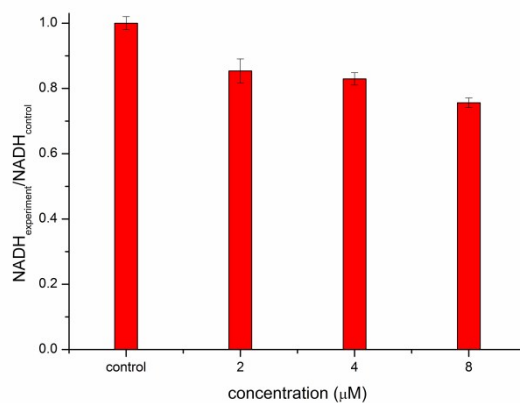

**Fig. S28** SKOV-3 cellular NADH changes in the presence of **1** with different concentrations upon 470 nm LED irradiation for 30 min (22.5  $\text{mW}/\text{cm}^2$ ) under hypoxic condition (3%  $\text{O}_2$ ).

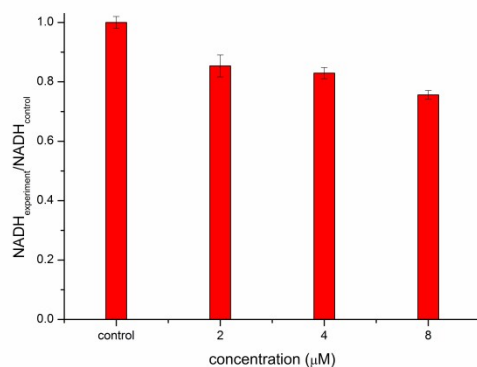

**Fig. S29** SKOV-3 cellular NADH changes in the presence of **2** with different concentrations upon 470 nm LED irradiation for 30 min (22.5 mW/cm<sup>2</sup>) under hypoxic condition (3% O<sub>2</sub>).

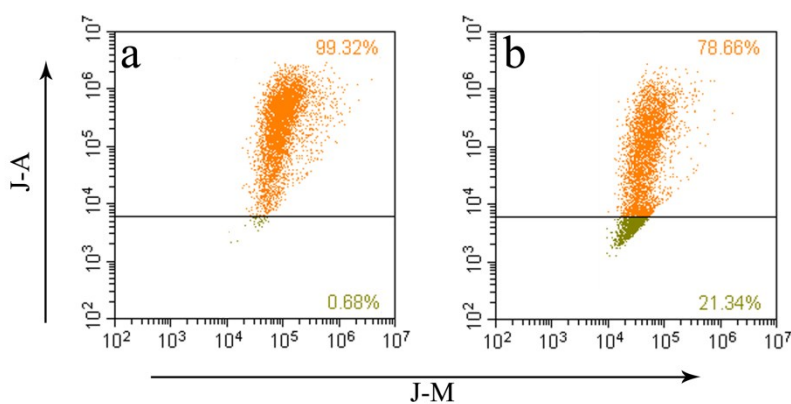

**Fig. S30** Effects of **3** (5 μM) on mitochondrial membrane potential of SKOV-3 cells analyzed by flow cytometry. a: dark control; b: irradiated with 470 nm LED for 30 min (22.5 mW/cm<sup>2</sup>) under hypoxic condition (3% O<sub>2</sub>).

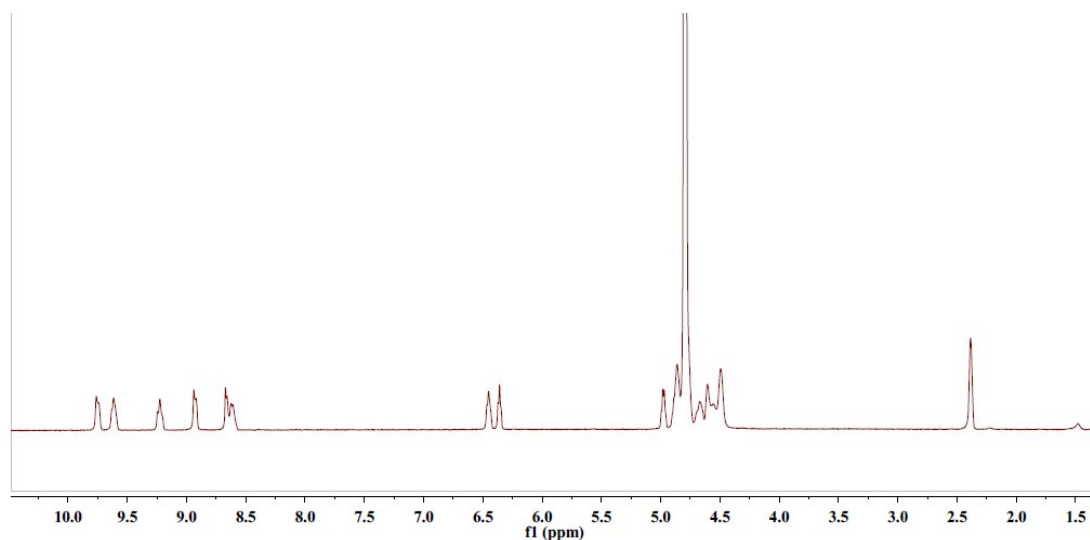

**Fig. S31** <sup>1</sup>H NMR spectrum of NAD<sup>+</sup> in CD<sub>3</sub>COCD<sub>3</sub>/D<sub>2</sub>O (1:1, v/v) solution.

## Reference

1. M. Kepczynski, R. P. Pandian, K. M. Smith, B. Ehrenberg, *Photochem. Photobiol.*, 2002, **76**, 127.
2. B. P. Sullivan, D. J. Salmon, T. J. Meyer, *Inorg. Chem.*, 1978, **17**, 3334.
